# Supplementary material for: Microbiological and clinical characteristics of hypervirulent Klebsiella pneumoniae isolated from patients in tertiary centers: a retrospective study
Source: PeerJ. 2025 Oct 16;13:e20198. doi: 10.7717/peerj.20198 (PMC12535742; doi:10.7717/peerj.20198)
Supplement: Supplemental Information 3 — 180 hvKp isolated from four hospitals in Kelantan, Malaysia. Patient demographic information, clinical details, and isolate characteristics. [file peerj-13-20198-s003.xlsx]

## Sheet: HVKP
HVKP	Hosp	Age	Gender	Type	Pneumonia	Abd Infection	Liver abscess	Sepsis	Others	DM	Pulmonary disease	CKD	HPT	cardiovascular disease	HMKP	K1	K2	rmpA	rmpA2	aerobactin	magA	peg3
1	HUSM	77	Male	TA	no	no	no	no	Left basal ganglia bleed	no	no	no	yes	no	no	no	no	yes	yes	yes	no	yes
2	HUSM	77	Male	TA	no	no	no	yes	no	yes	no	no	no	yes	no	no	no	yes	yes	yes	no	yes
3	HUSM	57	Male	TA	no	no	no	no	TBI	no	no	no	no	no	no	no	no	yes	yes	yes	no	yes
4	HUSM	77	female	bile	no	yes	no	no	choledocholithiasis	no	no	no	yes	yes	no	no	no	no	no	no	no	no
5	HUSM	48	Male	TA	yes	no	no	no	Old CVA with left hemiparesis	no	no	no	yes	no	no	no	no	yes	yes	yes	no	yes
6	HUSM	77	Male	TA	yes	no	no	no	Spinal cord injury secondary to alleged fall	no	no	no	no	no	yes	no	no	yes	yes	yes	no	yes
7	HUSM	57	Male	TA	no	no	no	no	TBI	no	no	no	no	no	no	no	no	yes	yes	yes	no	yes
8	HUSM	77	Male	TA	no	no	no	no	hpt emergency	no	no	no	yes	no	no	no	no	yes	yes	yes	no	yes
9	HUSM	37	Male	TA	yes	no	no	no	no	no	no	no	no	no	no	no	no	yes	yes	yes	no	yes
10	HUSM	16	Male	TA	yes	no	no	no	no	no	no	no	no	no	no	no	no	no	no	no	no	no
11	HUSM	64	Male	TA	no	no	no	no	post CABG	no	no	no	no	yes	yes	yes	no	yes	yes	yes	yes	yes
12	HUSM	72	Male	bile	no	no	no	no	choledocholithiasis	no	no	no	no	no	no	no	no	no	no	no	no	no
13	HUSM	76	Male	TA	yes	no	no	no	acute ischemic stroke	yes	no	no	yes	yes	yes	no	no	yes	yes	yes	no	yes
14	HUSM	63	Male	TA	yes	no	no	no	acute ischemic stroke	no	no	no	yes	no	no	no	no	yes	yes	yes	no	yes
15	HUSM	57	Male	TA	no	no	no	no	TBI	no	no	no	no	no	no	no	no	yes	yes	yes	no	yes
16	HUSM	16	Male	TA	yes	no	no	no	no	no	no	no	no	no	no	no	no	no	no	yes	no	no
17	HUSM	57	Male	TA	yes	no	no	no	Diabetic ketoacidosis	yes	no	yes	no	no	yes	no	no	yes	no	no	no	no
18	HUSM	69	Male	BAL	yes	no	no	no	aspiration pneumonia secondary to phrenic nerve palsy	no	no	no	no	no	no	yes	no	yes	yes	yes	yes	yes
19	HUSM	48	Male	TA	yes	no	no	no	hospital acquired pneumonia	no	no	no	yes	no	no	no	no	yes	yes	yes	no	yes
20	HUSM	67	Male	TA	yes	no	no	no	altered sensorium	no	no	no	yes	CRHD	yes	yes	no	yes	yes	yes	yes	yes
21	HUSM	67	female	bile	no	no	no	no	choledocholithiasis	no	no	no	no	no	no	no	no	no	no	yes	no	no
22	HUSM	64	Male	TA	no	no	no	no	humerus fracture	yes	no	yes	yes	no	no	no	no	no	no	no	no	no
23	HUSM	<1	Male	TA	no	no	no	no	Transposition of great arteries	no	no	no	no	no	no	no	no	no	no	no	no	no
24	HUSM	57	Male	TA	yes	no	no	no	TBI	no	no	no	no	no	no	no	no	yes	yes	yes	no	yes
25	HUSM	63	Male	sputum	yes	no	no	no	no	yes	no	no	no	no	yes	no	no	yes	yes	yes	no	yes
26	HUSM	46	Male	sputum	yes	no	no	no	no	no	no	no	no	no	yes	no	no	yes	yes	yes	no	yes
27	HUSM	46	Male	sputum	yes	no	no	no	no	yes	no	no	no	no	yes	no	no	yes	yes	yes	no	yes
28	HUSM	23	Male	sputum	yes	no	no	no	Disseminated TB	no	no	no	no	no	yes	no	no	yes	yes	yes	no	yes
29	HUSM	50	female	sputum	yes	no	no	no	tro ptb	yes	no	no	no	no	no	yes	no	yes	yes	yes	yes	yes
30	HUSM	66	Male	sputum	yes	no	no	no	acute ischemic stroke	yes	no	no	yes	yes	no	no	no	no	no	no	no	no
31	HUSM	79	Male	sputum	yes	no	no	no	tro ptb	no	no	no	no	no	no	no	no	no	no	no	no	no
32	HUSM	53	Male	sputum	no	no	no	no	nstemi	no	yes	no	yes	yes	yes	yes	no	yes	yes	yes	yes	yes
33	HUSM	53	Male	sputum	no	no	no	no	unstable angina	no	no	no	yes	no	no	no	no	no	no	no	no	no
34	HUSM	80	female	sputum	no	no	no	no	fluid overload	yes	no	yes	yes	no	no	no	no	no	no	yes	no	no
35	HUSM	84	Male	sputum	yes	no	no	no	acute on ckd	no	yes	yes	yes	no	no	no	no	no	no	yes	no	no
36	HUSM	72	Male	sputum	yes	no	no	no	aecopd, rectosigmoid ca	no	yes	no	no	no	yes	no	yes	yes	yes	yes	no	yes
37	HUSM	26	female	sputum	yes	no	no	no	aeba	no	no	no	no	no	no	no	no	no	no	no	no	no
38	HUSM	60	female	sputum	yes	no	no	no	metastatic breast ca	no	no	no	no	no	no	no	no	no	no	no	no	no
39	HUSM	55	Male	blood	no	no	no	no	ruptured aneurysm	no	no	no	no	no	no	no	no	yes	yes	yes	no	yes
40	HUSM	55	Male	blood	no	no	no	no	aneurysm	no	no	no	no	no	no	no	no	yes	yes	yes	no	yes
41	HUSM	71	Male	blood	yes	no	no	no	acute ischemic stroke	no	no	no	no	no	yes	yes	no	yes	yes	yes	yes	yes
42	HUSM	3	female	blood	no	no	no	yes	neutropenic sepsis, aml	no	no	no	no	no	no	no	no	no	no	no	no	no
43	HUSM	66	female	blood	no	no	no	yes	infective age	yes	no	yes	yes	yes	no	no	no	no	yes	yes	no	no
44	HUSM	9	female	blood	no	no	no	yes	B-ALL	no	no	no	no	no	no	no	no	no	no	no	no	no
45	HUSM	43	female	urine	no	no	no	no	rupture aneurysm	no	no	no	no	no	no	no	no	yes	yes	yes	no	yes
46	HUSM	50	Male	urine	no	no	no	no	bladder ca	no	no	no	no	no	no	no	no	no	no	no	no	yes
47	HUSM	56	female	urine	no	no	no	no	Ovarian tumor	no	no	no	yes	no	no	no	no	no	no	no	no	no
48	HUSM	44	Male	urine	no	no	no	no	Rectosigmoid ca	no	no	no	no	no	no	no	no	no	no	no	no	no
49	HUSM	26	female	urine	no	no	no	no	Severe preclampsia	yes	no	no	no	no	no	no	no	no	nn	no	no	no
50	HUSM	67	female	urine	no	no	no	no	renal calculi, SLE	no	no	no	no	no	no	no	no	no	no	yes	no	no
51	HUSM	21	female	urine	no	no	no	no	acute paraplegia	no	no	no	no	no	no	no	no	yes	no	no	no	yes
52	HUSM	67	female	urine	no	no	no	no	uti	no	no	no	no	no	no	no	no	no	no	no	no	no
53	HUSM	27	female	hvs	no	no	no	no	prom	no	no	no	no	no	no	no	no	no	no	no	no	no
54	HUSM	<1	female	swab	no	no	no	yes	prem baby	no	no	no	no	no	no	no	no	no	no	no	no	no
55	HUSM	28	Male	pus	no	no	yes	yes	perforated appendix	no	no	no	no	no	no	no	no	no	no	no	no	no
56	HUSM	58	Male	pus	no	no	no	yes	Right leg necrotizing fascitis	yes	no	no	no	no	no	no	no	no	no	no	no	no
57	HUSM	61	Male	pus	no	no	no	no	right auricular abscess	no	no	no	no	no	yes	no	yes	yes	yes	yes	no	yes
58	HUSM	53	Male	TA	no	no	no	no	alleged mva	no	no	no	yes	no	yes	no	no	yes	no	yes	no	yes
59	HUSM	23	Male	TA	no	no	no	no	TBI	no	no	no	no	no	yes	no	no	yes	no	no	no	no
60	HUSM	69	Male	TA	yes	no	no	yes	TBI	no	no	no	yes	no	no	no	no	yes	yes	yes	no	yes
61	HUSM	64	Male	TA	no	no	no	no	post CABG	yes	no	yes	yes	yes	yes	no	no	yes	no	no	no	no
62	HUSM	67	Male	TA	no	no	no	yes	acute supraglottitis	yes	no	no	yes	no	no	no	no	yes	yes	yes	no	yes
63	HUSM	84	Male	sputum	yes	no	no	no	no	no	yes	yes	yes	no	no	no	no	no	no	no	no	no
64	HUSM	33	female	sputum	no	no	no	no	post elective caesar	no	no	no	no	no	yes	yes	no	yes	yes	yes	yes	yes
65	HUSM	31	Male	sputum	yes	no	no	no	no	no	yes	no	no	no	no	no	no	no	no	no	no	no
66	HUSM	9	female	blood	no	no	no	yes	neutropenic fever with age	no	no	no	no	no	no	no	no	no	no	no	no	no
67	HUSM	52	female	blood	no	no	no	no	bipolar disorder	no	no	no	no	no	no	no	no	no	no	no	no	no
68	HUSM	1	female	blood	no	no	no	no	age	no	no	no	no	no	no	no	no	no	no	no	no	no
69	HUSM	54	Male	blood	no	yes	no	no	gallbladder empyema	yes	no	no	no	no	yes	no	no	yes	yes	yes	no	yes
70	HUSM	61	female	blood	no	no	no	yes	no	yes	no	no	yes	no	no	no	no	no	no	no	no	no
71	HUSM	20	female	urine	no	no	no	no	acute pyelonephritis	no	no	no	no	no	no	no	no	no	no	no	no	no
72	HUSM	62	female	BAL	yes	no	no	no	no	yes	no	no	no	no	no	no	no	no	no	yes	no	no
73	HUSM	73	Male	TA	no	no	no	no	Decompensated CCF	no	no	yes	yes	yes	no	no	no	no	no	no	no	no
74	HUSM	54	female	TA	yes	no	no	no	no	no	no	yes	yes	no	no	no	no	no	no	no	no	no
75	HUSM	85	Male	TA	no	no	no	no	aki secondary to obs uropathy secondary to BPH	no	no	yes	yes	no	no	no	no	no	no	no	no	no
76	HUSM	41	Male	TA	no	no	no	no	TBI	no	no	no	no	no	no	no	no	no	no	no	no	no
77	HUSM	21	Male	TA	no	no	no	no	Severe TBI	no	no	no	no	no	yes	no	yes	yes	yes	yes	no	yes
78	HUSM	70	female	TA	yes	no	no	no	chronic lung disease	no	yes	no	no	no	yes	no	no	yes	no	yes	no	yes
79	HUSM	14	Male	TA	yes	no	no	no	Severe head injury, developed HAP	no	no	no	no	no	no	no	no	yes	yes	yes	no	yes
80	HUSM	55	Male	TA	no	no	no	yes	Infected VP shunt	no	no	no	no	no	no	no	no	yes	yes	yes	no	yes
81	HUSM	48	female	TA	no	no	no	yes	infective age	no	no	yes	yes	yes	no	no	no	no	no	no	no	no
82	HUSM	62	Male	TA	no	no	no	no	intracranial hemorrhage secondary to hpt emergency	yes	no	yes	yes	no	yes	yes	no	yes	yes	yes	no	yes
83	HUSM	66	Male	sputum	yes	no	no	no	acute MI	no	no	no	yes	yes	no	no	no	no	no	no	no	no
84	HUSM	32	female	sputum	yes	no	no	no	no	no	yes	no	no	no	no	no	no	no	no	no	no	no
85	HUSM	70	Male	sputum	no	no	no	no	Right leg necrotizing fascitis	yes	no	yes	yes	yes	no	no	no	no	no	no	no	no
86	HUSM	41	Male	sputum	yes	no	no	no	Status epilepticus	no	no	no	no	no	yes	no	yes	yes	yes	yes	no	yes
87	HUSM	50	female	sputum	no	no	no	no	culture negative ie	no	no	no	no	yes	no	no	no	no	no	no	no	no
88	HUSM	45	Male	sputum	yes	no	no	no	no	yes	no	no	yes	no	no	no	no	no	no	no	no	no
89	HUSM	37	female	sputum	yes	yes	no	no	no	no	yes	no	no	no	yes	no	no	yes	yes	yes	no	yes
90	HUSM	67	female	sputum	no	no	no	no	left breast mass	yes	yes	no	yes	yes	no	no	yes	no	no	no	no	no
91	HUSM	33	Male	blood	no	no	no	no	alleged assault	no	no	no	no	no	no	no	no	no	no	no	no	no
92	HUSM	33	Male	blood	no	no	no	yes	no	no	no	no	no	no	no	no	no	no	no	no	no	no
93	HUSM	60	Male	blood	yes	no	no	no	fluid overload	yes	no	yes	yes	no	no	no	no	no	no	no	no	no
94	HUSM	61	Male	blood	yes	no	no	no	underlying cva	yes	no	yes	yes	no	no	no	no	no	no	no	no	no
95	HUSM	55	female	blood	no	no	no	no	catheter related infection	yes	no	yes	yes	no	no	no	no	no	no	no	no	no
96	HUSM	43	Male	pus	no	no	no	no	fournier gangrene	yes	no	no	no	no	yes	no	no	no	no	no	no	no
97	HUSM	51	Male	pus	no	no	no	no	left diabetic foot ulcer	yes	no	no	no	no	no	no	no	no	no	no	no	no
98	HUSM	50	Male	pus	no	no	no	no	left dfu	yes	no	no	no	no	no	no	no	no	no	no	no	no
99	HUSM	60	Male	pus	no	no	yes	no	no	yes	no	no	yes	no	no	no	no	yes	yes	yes	no	yes
100	HUSM	38	female	swab	no	no	no	no	chorioamnionitis	no	no	no	no	no	no	no	no	no	no	no	no	no
101	HUSM	33	female	urine	no	no	no	no	uti	no	no	no	no	no	no	no	no	no	no	no	no	no
102	HUSM	42	Male	urine	yes	no	no	no	hpt emergency	no	no	no	yes	no	no	no	no	yes	yes	yes	no	yes
103	HUSM	54	female	swab	no	no	no	no	ovarian ca	no	no	no	yes	no	yes	yes	no	yes	yes	yes	yes	yes
104	HUSM	28	female	swab	no	no	no	no	prom	no	no	no	no	no	no	no	no	no	no	no	no	no
105	HUSM	70	Male	TA	no	no	no	yes	no	no	no	no	yes	no	no	no	no	no	no	yes	no	no
106	HUSM	63	Male	TA	no	no	no	no	hpt emergency	no	no	no	yes	no	no	yes	no	yes	yes	yes	yes	yes
107	HUSM	53	female	TA	no	no	no	no	aortic valve replacement	yes	no	no	yes	no	yes	no	yes	yes	yes	yes	no	no
108	HUSM	68	Male	TA	yes	no	no	no	TBI	no	no	no	yes	no	no	no	no	no	yes	yes	no	no
109	HUSM	63	Male	TA	no	no	no	yes	no	no	no	no	no	no	no	no	no	yes	yes	yes	no	yes
110	HUSM	21	Male	TA	yes	no	no	no	severe TBI	no	no	no	no	no	no	no	no	no	no	no	no	no
111	HUSM	68	Male	TA	no	no	no	no	TBI	no	no	no	yes	no	no	yes	no	no	yes	yes	yes	no
112	HUSM	59	Male	sputum	yes	no	no	no	AMI	no	no	no	yes	yes	no	no	no	no	no	no	no	no
113	HUSM	33	female	sputum	no	no	no	no	post emergency caesar	no	yes	no	no	no	yes	no	no	yes	yes	yes	no	yes
114	HUSM	77	female	sputum	yes	no	no	no	nstemi	yes	yes	no	yes	yes	no	no	no	yes	yes	yes	no	yes
115	HUSM	59	female	sputum	yes	no	no	no	invasive breast ca	no	no	no	no	no	no	no	no	no	no	no	no	no
116	HUSM	34	Male	sputum	yes	no	no	no	no	no	yes	no	no	no	no	no	no	yes	yes	yes	no	yes
117	HUSM	47	female	sputum	yes	no	no	no	no	yes	no	no	no	no	no	no	no	yes	yes	yes	no	yes
118	HUSM	62	Male	sputum	yes	no	no	no	no	yes	no	yes	yes	no	yes	no	no	yes	yes	yes	no	yes
119	HUSM	43	female	blood	yes	no	no	no	ruptured aneurysm	no	no	no	no	no	yes	yes	no	yes	yes	yes	yes	yes
120	HUSM	32	Male	blood	no	no	no	no	B-cell lymphoma	no	no	no	no	no	no	no	no	no	no	no	no	no
121	HUSM	53	Male	blood	no	no	yes	no	Chronic Hep B	yes	yes	no	no	no	yes	yes	no	yes	yes	yes	yes	yes
122	HUSM	<1	Male	blood	no	no	no	no	bowel dismotility	no	no	no	no	no	no	no	no	no	no	no	no	no
123	HUSM	70	Male	blood	no	no	no	no	nstemi	yes	no	no	yes	no	no	no	no	yes	yes	yes	no	yes
124	HUSM	60	female	blood	no	no	no	yes	no	yes	no	yes	yes	no	no	no	no	yes	yes	yes	no	yes
125	HUSM	60	female	blood	yes	no	no	yes	no	yes	no	yes	yes	no	no	no	no	yes	yes	yes	no	yes
126	HUSM	11	female	swab	no	no	no	yes	right thigh synovial sarcoma	no	no	no	no	no	yes	no	no	no	no	no	no	no
127	HUSM	<1	Male	blood	no	no	no	yes	pilocyctic astrocytoma	no	no	no	no	no	no	no	no	no	no	no	no	no
128	HUSM	28	female	urine	no	no	no	no	preterm contraction	no	no	no	no	no	no	no	no	no	no	no	no	no
129	HUSM	25	female	swab	no	no	no	no	prom	no	no	no	no	no	yes	no	no	no	no	no	no	no
130	HUSM	68	female	pus	no	yes	no	yes	retroperitoneal abscess	no	no	no	no	no	yes	no	no	yes	no	no	no	no
131	HUSM	25	Male	TA	yes	no	no	yes	Severe TBI	no	no	no	no	yes	yes	no	no	yes	yes	yes	no	yes
132	HUSM	22	Male	TA	no	no	no	yes	Severe TBI	no	no	no	no	no	no	no	no	yes	yes	yes	no	yes
133	HUSM	13	female	TA	no	no	no	no	Status epilepticus	no	no	no	no	no	no	no	no	yes	yes	yes	no	yes
134	HUSM	27	female	TA	no	no	no	no	hemangioblastoma	no	no	no	no	no	no	no	no	no	no	no	no	no
135	HUSM	70	Male	TA	no	no	no	no	nstemi	yes	no	no	yes	no	no	no	no	yes	yes	yes	no	yes
136	HUSM	28	Male	TA	yes	no	no	no	Severe TBI	no	no	no	no	no	yes	yes	no	yes	yes	yes	yes	yes
137	HUSM	16	female	sputum	yes	no	no	no	no	no	no	no	no	no	no	no	no	no	no	no	no	no
138	HUSM	60	female	sputum	yes	no	no	no	advanced breast ca	no	no	no	no	no	no	no	no	no	no	no	no	no
139	HUSM	57	female	sputum	no	no	no	no	TBI	yes	no	no	no	no	no	no	no	yes	yes	yes	no	yes
140	HUSM	63	female	blood	no	no	no	yes	Infected hip wound	yes	no	no	yes	no	no	no	no	yes	yes	yes	no	yes
141	HUSM	49	female	blood	no	no	no	yes	no	yes	no	yes	no	yes	no	no	no	yes	yes	yes	no	yes
142	HUSM	48	female	blood	no	no	no	yes	no	yes	no	yes	no	yes	no	no	no	yes	yes	yes	no	yes
143	HUSM	<1	female	swab	no	no	no	yes	no	no	no	no	no	no	no	no	no	no	no	no	no	no
144	HUSM	29	female	urine	no	no	no	no	possible failing pregnancy	no	no	no	no	no	no	no	no	no	no	no	no	no
145	HUSM	25	female	urine	no	no	no	no	postnatal	no	no	no	no	no	no	no	no	no	no	no	no	no
146	HUSM	22	female	urine	no	no	no	yes	uti	no	no	no	no	no	no	no	no	no	no	no	no	no
147	HUSM	30	female	swab	no	no	no	no	prom	no	no	no	no	no	no	no	no	no	no	no	no	no
148	HRPZ II	59	female	pus	no	no	no	yes	right diabetic foot ulcer	yes	no	no	yes	no	no	no	yes	yes	no	yes	no	yes
149	HRPZ II	62	Male	sputum	yes	no	no	no	no	no	no	no	yes	no	no	no	no	no	no	no	no	no
150	HRPZ II	65	female	blood	no	no	no	yes	urosepsis secondary to obstructive uropathy	no	no	no	no	no	no	yes	no	yes	yes	yes	no	no
151	HRPZ II	55	female	blood	yes	no	no	no	no	yes	no	no	yes	no	no	no	no	no	no	no	no	no
152	HRPZ II	49	female	blood	no	no	no	no	intestinal obstruction	no	no	no	yes	no	no	yes	no	yes	yes	yes	no	no
153	HRPZ II	49	Male	blood	no	no	no	no	recurrent cva	no	no	no	yes	yes	no	no	no	no	no	no	no	no
154	HRPZ II	60	female	pus	no	no	no	no	left diabetic foot ulcer	yes	no	no	no	no	no	yes	no	yes	yes	yes	no	no
155	HRPZ II	44	Male	blood	no	no	no	yes	B-cell lymphoma	no	no	no	no	no	yes	no	no	no	no	no	no	no
156	HRPZ II	38	female	blood	no	yes	no	no	no	no	no	no	yes	no	no	no	no	no	no	yes	no	no
157	HRPZ II	30	Male	blood	no	no	no	yes	Diabetic ketoacidosis	yes	no	no	no	no	no	no	no	no	no	no	no	no
158	HRPZ II	71	Male	urine	no	no	no	no	obstructive uropathy secondary to BPH	no	no	yes	yes	no	yes	no	no	no	no	no	no	no
159	HRPZ II	51	female	blood	yes	no	no	no	hyperosmolar hyperglycemis syndrome	yes	no	no	yes	no	no	no	no	yes	yes	yes	no	yes
160	HRPZ II	58	Male	pus	no	no	no	yes	prostate abscess	yes	no	yes	yes	no	no	no	no	no	no	no	no	no
161	HRPZ II	80	Male	sputum	yes	no	no	no	no	yes	no	yes	yes	yes	no	yes	no	yes	yes	yes	yes	yes
162	HRPZ II	30	Male	TA	no	no	no	no	Diabetic ketoacidosis	yes	no	no	yes	no	no	no	no	yes	yes	yes	no	yes
163	HRPZ II	59	Male	urine	no	no	no	no	uropathy secondary prostate adenocarcinoma	no	no	yes	yes	no	no	no	no	no	no	no	no	no
164	HRPZ II	78	Male	pus	no	no	no	yes	buttock abscess	yes	no	yes	no	no	yes	no	no	no	no	no	no	no
165	HTM	79	female	pus	no	no	yes	no	no	no	no	no	no	no	yes	no	no	yes	no	no	no	yes
166	HTM	66	Male	blood	yes	no	no	no	no	no	no	no	no	yes	yes	no	yes	yes	yes	yes	no	yes
167	HTM	54	Male	blood	yes	no	no	no	pancreatic carcinoma	no	no	no	no	no	no	no	no	no	no	no	no	no
168	HTM	62	female	blood	no	no	no	no	crbsi	no	no	yes	yes	no	no	no	yes	yes	yes	yes	no	yes
169	HTM	58	Male	pus	no	no	no	yes	Infected stump	yes	no	no	no	no	no	no	no	no	no	no	no	no
170	HTM	63	female	blood	yes	no	no	no	no	yes	no	no	no	no	no	no	no	no	no	no	no	no
171	HTM	29	Male	sputum	no	no	no	no	altered sensorium to rule out connective tissue disease	no	no	no	no	no	no	no	no	no	no	no	no	no
172	HSIP	80	female	blood	no	no	no	yes	no	yes	no	no	no	no	no	no	no	no	no	no	no	no
173	HTM	44	female	swab	no	no	no	no	acute appendicitis	no	no	nn	no	no	yes	no	no	no	no	no	no	no
174	HSIP	61	Male	TA	no	no	no	no	cardiogenic shock	no	no	no	no	yes	no	yes	no	yes	yes	yes	yes	yes
175	HSIP	53	Male	blood	no	yes	no	no	no	no	no	yes	no	no	no	no	no	no	no	no	no	no
176	HTM	64	female	pus	no	yes	no	no	renal abscess	yes	no	no	no	no	no	no	no	no	no	no	no	no
177	HTM	50	Male	blood	yes	no	no	yes	nstemi	yes	no	no	yes	yes	yes	no	yes	yes	yes	yes	no	yes
178	HSIP	79	Male	sputum	yes	no	no	no	aecopd secondary cap	no	yes	no	yes	no	no	yes	no	yes	yes	yes	yes	yes
179	HTM	46	female	blood	yes	no	no	no	no	yes	no	no	no	no	yes	no	no	no	no	no	no	no
180	HSIP	51	Male	blood	no	no	no	no	left neck abscess	yes	no	no	no	no	no	no	yes	yes	yes	yes	no	yes
